# Supplementary material for: Systematic Screening of Commonly Used Commercial Transfection Reagents towards Efficient Transfection of Single-Stranded Oligonucleotides
Source: MDPI journal article supplement (doi:10.3390/molecules23102564), 2018-10-08
Supplement: s1 [file s1]

Article

# Systematic Screening of Commonly Used Commercial Transfection Reagents towards Efficient Transfection of Single-Stranded Oligonucleotides

Tao Wang<sup>1,2†</sup>, Leon Larcher<sup>1†</sup>, Lixia Ma<sup>3</sup>, Rakesh N. Veedu<sup>1,2\*</sup>

<sup>1</sup> Centre for Comparative Genomics, Murdoch University, Perth, WA 6150, Australia

<sup>2</sup> Perron Institute for Neurological and Translational Science, Perth, WA 6009, Australia

<sup>3</sup> School of Statistics, Henan University of Economics and Law, Henan Province, 450046, China

<sup>†</sup> These authors contributed equally

\* Correspondence: R.Veedu@murdoch.edu.au; Tel.: +61 8 9360 2803

Received: date; Accepted: date; Published: date

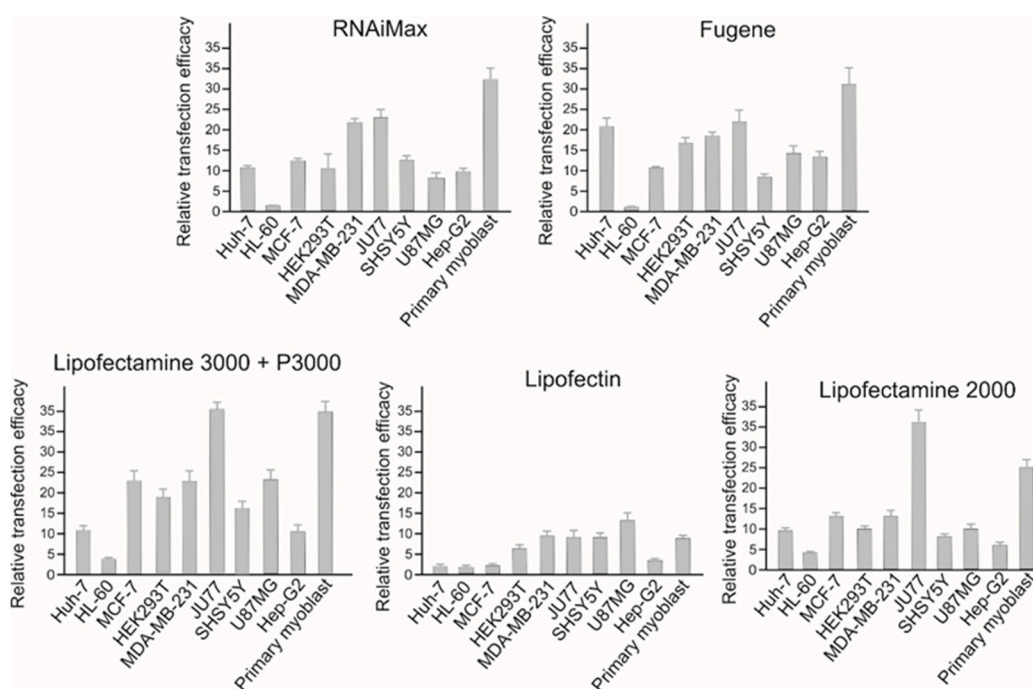

**Figure S1.** *In vitro* transfection efficiency of different transfection reagents in 10 established cells.
